1  
2  
3  
4  
5  
6  
7  
8  
9  
10  
11  
12  
13  
14  
15  
16  
17  
18  
19  
20  
21  
22  
23  
24  
25  
26  
27  
28  
29  
30  
31  
32  
33  
34  
35  
36  
37  
38  
39  
40  
41

**The frequency spectrum of chromatin accessibility in Yorubans points toward a significant role of random genetic drift in shaping the chromatin landscape**

Mariah Weavil-Abueg<sup>1,2</sup> and Joshua G. Schraiber<sup>2,3\*</sup>

<sup>1</sup> School of Aquatic and Fisheries Sciences, Univeristy of Washington, Seattle, WA

<sup>2</sup> Department of Genome Sciences, University of Washington, Seattle, WA

<sup>3</sup> Department of Biology, Temple University, Philadelphia, PA

\* Correspondence to:

Joshua G. Schraiber, PhD  
joshua.schraiber@temple.edu  
Department of Biology  
Temple University  
Philadelphia, PA

1 **Abstract**

2 The function of non-coding variation in the human genome is hotly debated. While much of the  
3 genome appears to be involved in some kind of molecular activity, a relatively small portion of  
4 the genome appears to be conserved across mammalian species. To try to understand part of  
5 this seeming paradox, we examined chromatin accessibility as a model molecular phenotype.  
6 We modeled chromatin state as either open or closed as looked at the frequency of open  
7 chromatin across 70 Yoruban cell lines. We saw that most regions of chromatin accessibility  
8 occurred in only a small number of individuals, although there are a number of regions that are  
9 accessible across the entire panel. To delve further into understanding the evolutionary  
10 mechanisms, we examined nucleotide diversity in and around accessible regions. We found  
11 that in the open chromatin access, low frequency regions had decreased nucleotide diversity,  
12 however, they were situated within regions of elevated nucleotide diversity. These results point  
13 toward a role of random mutation and genetic drift shaping the distribution of accessible  
14 regions in the human genome.

15

16

17

18

19

20

21

22

## 1 Introduction

2

3 The vast majority of the human genome (~95%) is made up of intergenic DNA. Several  
4 hypotheses exist to explain the preponderance of such non-coding DNA, ranging from neutral  
5 arguments that genome architecture is shaped by the mutation landscape [1] to functional  
6 hypotheses that this large amount of non-coding DNA allows for complex, modular and  
7 evolvable regulatory networks [2,3]. A key evolutionary prediction of the selective hypotheses  
8 is that intergenic DNA should show signatures of purifying selection, maintaining functional  
9 regions across evolutionary history; however, only approximately ~5-10% of the genome seems  
10 to be evolving under purifying selection [4], which still leaves a large amount of non-coding  
11 DNA to be explained.

12

13 On the other hand, the functions of intergenic DNA may be highly buffered and turn over  
14 quickly, so looking directly at functional readouts is important for understanding the  
15 importance of non-coding DNA in humans. In 2012, the ENCODE consortium claimed that 80%  
16 of the human genome had some biochemical function [5]. They claimed that regions long  
17 thought to serve no biological role were important in shaping human phenotypes, which  
18 spurred controversy around what, exactly, is considered functional [6-8]. By definition, these  
19 regions do not code for proteins; however, they seem to be involved in some kind of  
20 transcriptional activity and/or DNA-protein interaction, suggesting a role in modulating gene  
21 expression.

22

1 One of the many factors affecting gene expression is the physical state of the DNA. While most  
2 of the genome is wound tightly around histone proteins (such regions are referred to as closed  
3 or inaccessible chromatin and likely to be transcriptionally silent, other areas are free of  
4 histones. Such regions of open, or accessible, chromatin, areas where the DNA is unwound,  
5 allow for proteins to bind to the DNA and the gene to be transcribed [9].

6

7 There is abundant evidence that chromatin accessibility both shapes and is shaped by  
8 transcriptional processes. For instance, transcription factors can prime accessible regions [10]  
9 and those open regions can direct the subsequent binding of downstream transcription factors  
10 [11].

11

12 Because chromatin accessibility varies across individuals in a population, there ought to be  
13 information about the causes and consequences of chromatin accessibility in polymorphism  
14 data. Recently, a group used DNase I hypersensitivity sequencing (DNase-seq) and mapped  
15 accessibility quantitative trait loci (dsQTL) [12]. Interestingly, they found that dsQTL significantly  
16 overlap with gene expression QTL (eQTL) of year-by genes, suggesting a role of chromatin  
17 variability among individuals in shaping expression variability among individuals. Moreover,  
18 frequently dsQTLs were seen within 200-300 base pairs of open chromatin regions, pointing  
19 toward the importance of *cis*-acting mutations in shaping both chromatin accessibility and gene  
20 expression.

21

1 Here, we revisit the data from Degner et al, identifying and characterizing differences in open  
2 chromatin regions in a population. By viewing chromatin accessibility as a high-dimensional  
3 phenotype, we can view each individual region of accessible chromatin as a correlated replicate  
4 of the same kind of evolutionary process, similar to how SNPs across the genome can be viewed  
5 as correlated replicates of the mutational and evolutionary process. This allows us to apply  
6 intuitions from population genetics directly to the phenotypes themselves, which may yield  
7 insights that would be difficult to obtain by examining sequence variation alone.

8

## 9 **Materials and Methods**

10

### 11 *DNase data*

12

13 We downloaded publically accessible DNase I hypersensitivity data from 70 Yoruban  
14 lymphoblastoid cell lines, which has been aligned by Degner et al. Mapped reads were stored in  
15 a custom format by Degner et al, and were converted to .bed files using a custom script.

16

### 17 *Calling DNase I Hypersensitivity Peaks*

18

19 On the basis of a recent analysis [13] we used Hotspot [11] to detect regions of open  
20 chromatin. We used an FDR of 0.01 and used the mappability files for 22bp reads provided by  
21 the authors of Hotspot. We merged peaks across individuals using bedops [14].

22

## 1 *Peak Trimming*

2

3 Merging peaks across individuals can result in artificial overlap in DHS across individuals by  
4 inadvertently merging long stretches of nearby peaks. To compensate, we imposed two filters  
5 on all of our peaks. First, we required that merged peaks don't merge two peaks that were  
6 called separately in a single individual. Second, we examined the length of the merged peaks.  
7 Figure 1A shows that empirical cumulative distribution function of merged peak lengths, while  
8 Figure 1B shows how many individuals are repeated in a given peak as a function of its length.  
9 On the basis of examining these figures, we chose the require peaks be less than 500bp. In  
10 total, we had 1,176,504 DHS across the 70 individuals, which was reduced to 772,617 peaks  
11 with a mean length of 270.3bp after trimming.

12

## 13 *Population genetic analysis*

14

15 To examine population genetic properties of chromatin accessibility polymorphism, we  
16 computed the nucleotide diversity for each polymorphic DHS we identified. We downloaded  
17 the 1000 genomes phase 3 data [15], and restricted our analysis to Yoruban individuals. We  
18 then computed nucleotide diversity for a given DHS as

$$\pi = 2 \frac{n}{n-1} \sum_i p_i (1 - p_i)$$

19 where  $i$  ranges over all variable sites in the DHS,  $n$  is the number of individuals, and  $p_i$  is the  
20 frequency of polymorphic site  $i$ . We computed nucleotide diversity in two types of windows: in

1 one situation, we restricted the calculation to within the merged DHS, and in the other we  
2 expanded 200bp outside of the called peak.

3

#### 4 **Results**

5

6 We first computed the frequency distribution of regions of accessible chromatin that passed  
7 our filters (Figure 2). The frequency spectrum mostly displays a negative slope, with higher  
8 frequency DHS occurring more and more rarely. However, there is an enrichment of regions  
9 that are found to be open in all individuals (lower right corner).

10

11 We next examined the population genetic properties of regions of accessible chromatin that  
12 occur at different frequencies. We found contrasting patterns depending on whether we  
13 examined polymorphism exclusively within the DHS or including 200 base pairs of surrounding  
14 sequencing. When we look at just the merged peak region, we see that there is lower  
15 nucleotide diversity in regions of lower frequency DHS (Figure 3A). However, when including  
16 200bp of sequence context, we see higher nucleotide diversity in regions where the fewest  
17 individuals share a region of accessible chromatin (Figure 3B). In both cases, there appears to  
18 be a trend toward lower nucleotide diversity as the frequency of open chromatin reaches  
19 middle frequencies, although there are so few high frequency regions that there is not much  
20 signal for them.

21

#### 22 **Discussion**

1

2 Despite making up a vast majority of the human genome, the importance of non-coding DNA is  
3 poorly understood. Although much of the genome is involved in some kind of measurable  
4 molecular activity [5], the extent to which that activity represents an important function is  
5 unknown.

6

7 One important window into the fitness consequences of non-coding variation is examination of  
8 nucleotide polymorphism that may underlie molecular phenotypes. To that end, several studies  
9 have identified QTL for various aspects of molecular activity, including gene expression,  
10 chromatin accessibility, and DNA-protein interactions [12,16-20]. By analyzing variation in and  
11 around QTL for molecular phenotypes, inferences can be made about the evolutionary  
12 importance of these loci, and hence the importance of the traits they control.

13

14 The high dimensional nature of molecular activity also makes studying phenotypes in-and-of-  
15 themselves a valuable tool for understanding their fitness consequences. This kind of approach  
16 has been successful in analyzing gene expression evolution in molecular pathways [21-24]  
17 adapted this idea to think of each individual region of accessible chromatin as a two-state  
18 discrete phenotype and examined polymorphism in chromatin accessibility across 70 Yoruban  
19 cell lines.

20

21 Interestingly, we found that most DNase-I hypersensitivity sites occur at a low frequency in  
22 these cell lines. This is suggestive that many regions of accessible chromatin may be simply a



1 result of random effects, either due to low frequency mutations changing DNA-histone  
2 interactions or simply rare, stochastic biophysical effects. We do see a spike of DHS that occur  
3 in every individual assayed, which is suggestive that those may be critical to cellular function.

4  
5 To gain some insight into the functional importance of regions of accessible chromatin that  
6 occur at different frequencies across individuals, we computed nucleotide diversity across the  
7 different frequency categories. Unexpectedly, we found that whether we focus explicitly on the  
8 DHS region or include 200 base pairs of context made a strong difference in findings. When  
9 considering the region of open chromatin itself, we found that low frequency regions had  
10 decreased nucleotide diversity. This observation ran contrary to our expectation that such low  
11 frequency regions may be due to random mutations in more polymorphic regions of the  
12 genome. However, when considering 200 base pairs of context, we found that lower frequency  
13 regions of open chromatin indeed had elevated levels of nucleotide diversity. This may suggest  
14 a complicated role of mutational context in shaping the landscape of low frequency chromatin  
15 accessibility.

16  
17 As we expected, regions with a higher frequency of chromatin accessibility seem to show a  
18 trend for lower levels of nucleotide diversity, suggesting that they are more highly constrained.  
19 However, the pattern is difficult to discern due to the low number of high frequency accessible  
20 regions. More sensitive measurements of chromatin accessibility may lead to overall more  
21 regions detected and may increase the power to understand the mechanisms underlying the  
22 maintenance of high frequency DHS.

1

2 Our results suggest a key role for random processes in shaping the chromatin landscape in  
3 humans. This does not necessarily imply that chromatin accessibility is by-and-large a neutral  
4 trait. In particular, there may be modules of coordinated regions of chromatin, of which only a  
5 subset of regions are required to be open in order for downstream functions to occur. In this  
6 case, any individual region may appear to evolve neutrally, when not considered in the context  
7 of the larger module. Future work should consider patterns of chromatin accessibility in  
8 physically proximal regions, as well as incorporate information about known enhancers and  
9 their downstream targets.

10

11 Although we motivated our work by appealing to the standard models of population genetics,  
12 we did not actually pursue any theoretical models. A promising direction for the future is to  
13 attempt to model chromatin accessibility variability in a population from first principles, for  
14 example by using a threshold model [25].

15

16 By integrating insights from molecular and evolutionary studies, we can make progress toward  
17 an understanding of non-coding variation in humans as well as further details about the  
18 molecular features that lead to human specific traits.

19

20

## 21 **Acknowledgements**

22 We thank Joshua Akey for helpful discussions about this work.

1

2

3

4

5

6

7

8

9

10

11

12

13

14

15

16

17

18

19

20

21 **Figure Legends**

22

1 **Figure 1.** Panel A: Empirical cumulative distribution function of lengths of merged peaks. The x  
2 axis shows peak length, while the y axis shows the proportion of peaks with that length or less.  
3 Solid vertical line indicates the cutoff of 500bp that we chose for filtering peaks. Panel B:  
4 Smoothed scatter plot of number of repeated individuals per peak against merged peak length.  
5 Red indicates high density, blue indicates low density. An individual is counted as repeated if at  
6 least two distinct peaks from the single-individual peak calling show up as part of one peak in  
7 the merged call.

8  
9 **Figure 2.** Frequency spectrum of accessible chromatin. The x axis is the number of individuals in  
10 which a region is called accessible, and the y axis is the number of regions with that frequency  
11 of accessibility. Note that y axis is log scaled.

12  
13 **Figure 3.** Nucleotide diversity in and around accessible regions of different frequencies. In each  
14 panel, the x axis shows the frequency of the accessible region and the y axis shows the  
15 nucleotide diversity. Panel A shows nucleotide diversity estimated only within the peak region,  
16 while Panel B shows nucleotide diversity estimated in the peak region and 200bp of context on  
17 either side.

18  
19  
20

- 21 1. Lynch M, Walsh B. The origins of genome architecture. 2007.
- 22 2. Lim WA, Lee CM, Tang C. Design Principles of Regulatory Networks: Searching for the  
23 Molecular Algorithms of the Cell. *Molecular Cell*. 2013;49: 202–212.  
24 doi:10.1016/j.molcel.2012.12.020
- 25 3. Modular Evolution of DNA-Binding Preference of a Tbrain Transcription Factor Provides a

- 1 Mechanism for Modifying Gene Regulatory Networks. *Mol Biol Evol.* Oxford University  
2 Press; 2014;31: 2672–2688. doi:10.1093/molbev/msu213
- 3 4. Rands CM, Meader S, Ponting CP, Lunter G. 8.2% of the Human Genome Is Constrained:  
4 Variation in Rates of Turnover across Functional Element Classes in the Human Lineage.  
5 Schierup MH, editor. *PLOS Genet.* Public Library of Science; 2014;10: e1004525.  
6 doi:10.1371/journal.pgen.1004525
- 7 5. Consortium TEP. An integrated encyclopedia of DNA elements in the human genome.  
8 *Nature.* Nature Publishing Group; 2012;489: 57–74. doi:10.1038/nature11247
- 9 6. Germain P-L, Ratti E, Boem F. Junk or functional DNA? ENCODE and the function  
10 controversy. *Biol Philos.* Springer Netherlands; 2014;29: 807–831. doi:10.1007/s10539-  
11 014-9441-3
- 12 7. Graur D, Zheng Y, Price N, Azevedo RBR, Zufall RA, Elhaik E. On the Immortality of  
13 Television Sets: “Function” in the Human Genome According to the Evolution-Free  
14 Gospel of ENCODE. *Genome Biol Evol.* Oxford University Press; 2013;5: 578–590.  
15 doi:10.1093/gbe/evt028
- 16 8. Kellis M, Wold B, Snyder MP, Bernstein BE, Ward LD, Kundaje A, et al. Defining functional  
17 DNA elements in the human genome. *Proc Natl Acad Sci USA.* National Acad Sciences;  
18 2014;111: 6131–6138. doi:10.1073/pnas.1318948111
- 19 9. Boyle AP, Davis S, Shulha HP, Meltzer P, Margulies EH, Weng Z, et al. High-Resolution  
20 Mapping and Characterization of Open Chromatin across the Genome. *Cell.* 2008;132:  
21 311–322. doi:10.1016/j.cell.2007.12.014
- 22 10. Buenrostro JD, Wu B, Litzenburger UM, Ruff D, Gonzales ML, Snyder MP, et al. Single-cell  
23 chromatin accessibility reveals principles of regulatory variation. *Nature.* Nature  
24 Research; 2015;523: 486–490. doi:10.1038/nature14590
- 25 11. John S, Sabo PJ, Thurman RE, Sung M-H, Biddie SC, Johnson TA, et al. Chromatin  
26 accessibility pre-determines glucocorticoid receptor binding patterns. *Nature Genetics.*  
27 *Nature Research*; 2011;43: 264–268. doi:10.1038/ng.759
- 28 12. Degner JF, Pai AA, Pique-Regi R, Veyrieras J-B, Gaffney DJ, Pickrell JK, et al. DNase I  
29 sensitivity QTLs are a major determinant of human expression variation. *Nature.* *Nature*  
30 *Research*; 2012;482: 390–394. doi:10.1038/nature10808
- 31 13. Koohy H, Down TA, Spivakov M, Hubbard T. A Comparison of Peak Callers Used for  
32 DNase-Seq Data. Helmer-Citterich M, editor. *PLOS ONE.* Public Library of Science; 2014;9:  
33 e96303. doi:10.1371/journal.pone.0096303
- 34 14. Neph S, Kuehn MS, Reynolds AP, Haugen E, Thurman RE, Johnson AK, et al. BEDOPS:  
35 high-performance genomic feature operations. *Bioinformatics.* Oxford University Press;

- 1           2012;28: 1919–1920. doi:10.1093/bioinformatics/bts277
- 2   15.   The 1000 Genomes Project Consortium. A global reference for human genetic variation.  
3       Nature. Nature Research; 2015;526: 68–74. doi:10.1038/nature15393
- 4   16.   Pai AA, Pritchard JK, Gilad Y. The Genetic and Mechanistic Basis for Variation in Gene  
5       Regulation. Lappalainen T, editor. PLOS Genet. Public Library of Science; 2015;11:  
6       e1004857. doi:10.1371/journal.pgen.1004857
- 7   17.   Brem RB, Kruglyak L. The landscape of genetic complexity across 5,700 gene expression  
8       traits in yeast. Proc Natl Acad Sci USA. National Acad Sciences; 2005;102: 1572–1577.  
9       doi:10.1073/pnas.0408709102
- 10 18.   Gilad Y, Rifkin SA, Pritchard JK. Revealing the architecture of gene regulation: the  
11       promise of eQTL studies. Trends Genet. 2008;24: 408–415. doi:10.1016/j.tig.2008.06.001
- 12 19.   Majewski J, Pastinen T. The study of eQTL variations by RNA-seq: from SNPs to  
13       phenotypes. Trends Genet. 2011;27: 72–79. doi:10.1016/j.tig.2010.10.006
- 14 20.   McVicker G, van de Geijn B, Degner JF, Cain CE, Banovich NE, Raj A, et al. Identification of  
15       Genetic Variants That Affect Histone Modifications in Human Cells. Science. American  
16       Association for the Advancement of Science; 2013;342: 747–749.  
17       doi:10.1126/science.1242429
- 18 21.   Martin HC, Roop JJ, Schraiber JG, Hsu TY, Brem RB. Evolution of a Membrane Protein  
19       Regulon in Saccharomyces. Mol Biol Evol. Oxford University Press; 2012;29: mss017–  
20       1756. doi:10.1093/molbev/mss017
- 21 22.   Schraiber JG, Mostovoy Y, Hsu TY, Brem RB. Inferring Evolutionary Histories of Pathway  
22       Regulation from Transcriptional Profiling Data. Teichmann SA, editor. PLOS Comput Biol.  
23       Public Library of Science; 2013;9: e1003255. doi:10.1371/journal.pcbi.1003255
- 24 23.   Fraser HB. Gene expression drives local adaptation in humans. Genome Res. Cold Spring  
25       Harbor Lab; 2013;23: 1089–1096. doi:10.1101/gr.152710.112
- 26 24.   Bullard JH, Mostovoy Y, Dudoit S, Brem RB. Polygenic and directional regulatory  
27       evolution across pathways in Saccharomyces. Proc Natl Acad Sci USA. National Acad  
28       Sciences; 2010;107: 5058–5063. doi:10.1073/pnas.0912959107
- 29 25.   Felsenstein J. Using the quantitative genetic threshold model for inferences between and  
30       within species. Philos Trans R Soc B-Biol Sci. The Royal Society; 2005;360: 1427–1434.  
31       doi:10.1098/rstb.2005.1669

32

**A**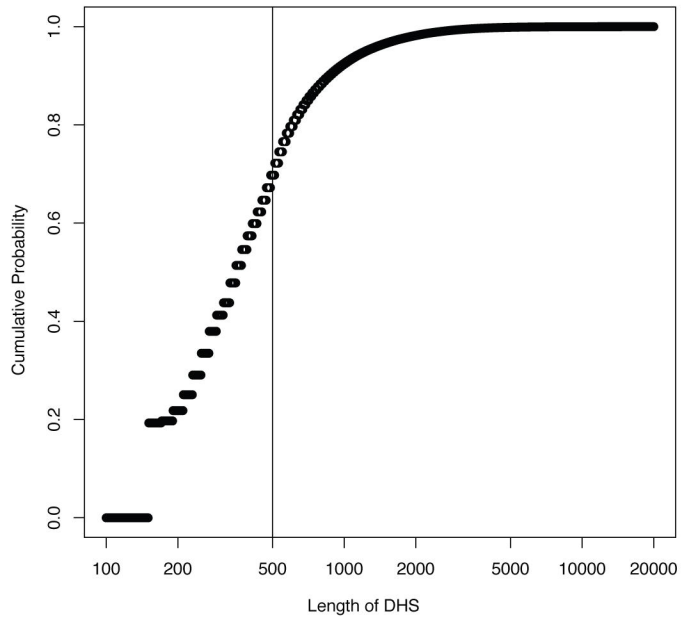**B**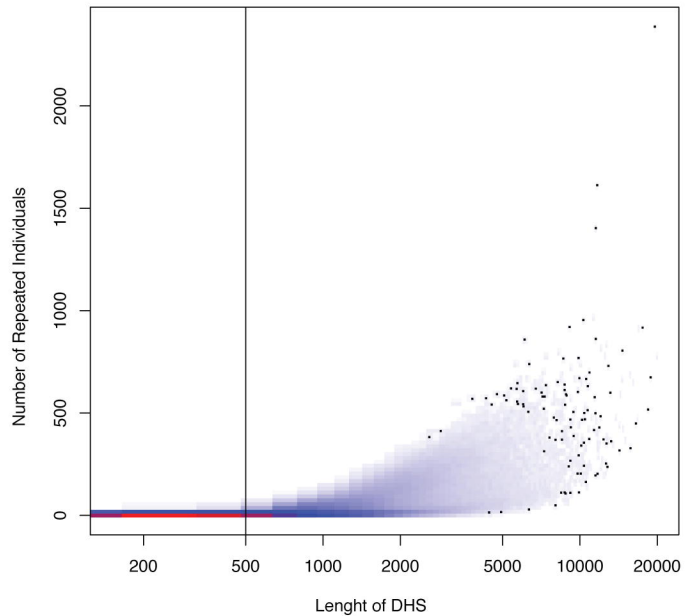

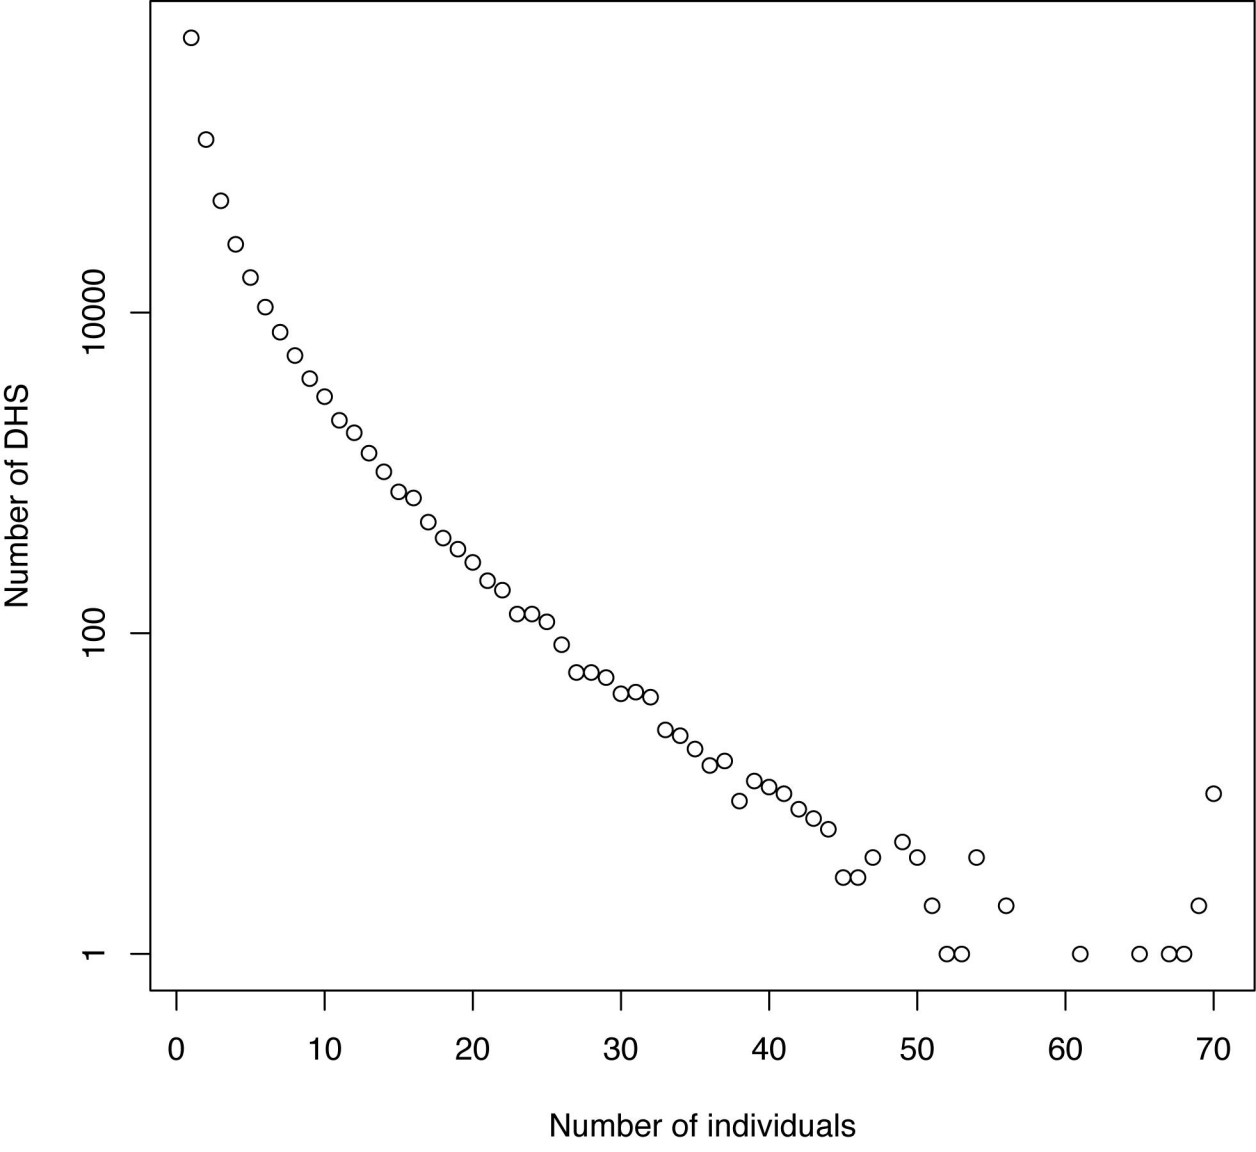



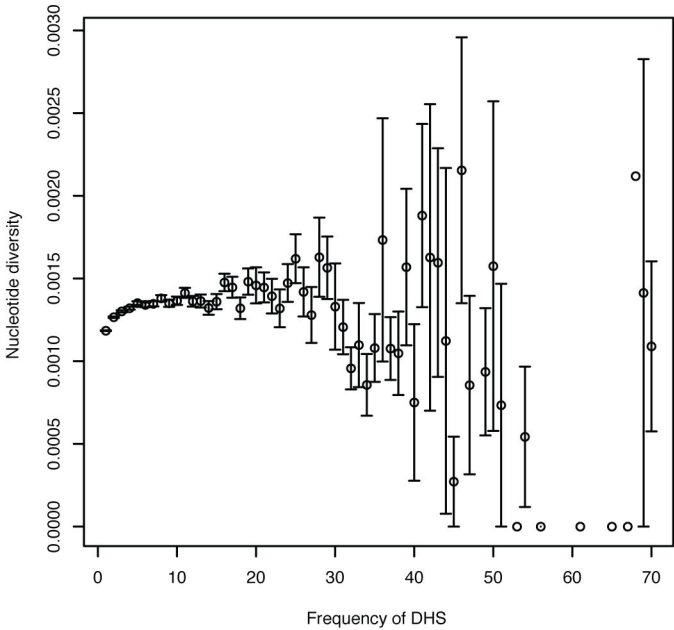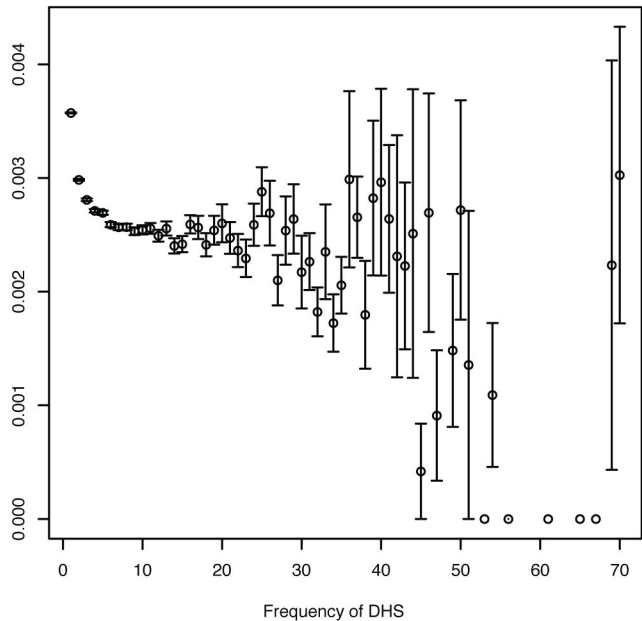

Source: http://www.biorxiv.org/content/10.1101/068718v2.full.pdf
